# Supplementary material for: Isolation and characterization of a new type of μ-hydroxo-bis-Zn(salphen) assembly
Source: Royal Society of Chemistry journal article supplement (doi:10.1039/c001801e), 2010-01-01
Supplement: c001801e.pdf [file c001801e.pdf]

Supporting Information:

**Isolation and Characterization of a New Type of Biomimetic  
 $\mu$ -Hydroxy-bis-Zn(salphen) Sandwich Structure**

Daniele Anselmo,<sup>†</sup> Eduardo C. Escudero-Adán,<sup>†</sup> Jordi Benet-Buchholz<sup>†</sup> and Arjan W. Kleij<sup>†,‡,\*</sup>

<sup>†</sup> Institute of Chemical Research of Catalonia (ICIQ), Av. Països Catalans 16, 43007 Tarragona, Spain

<sup>‡</sup> Institució Catalana de Recerca i Estudis Avançats (ICREA), Pg. Lluís Companys 23, 08010 Barcelona, Spain.

E-mail: [akleij@iciq.es](mailto:akleij@iciq.es)

**Contents:**

|          |                                                                                                                                                                                             |
|----------|---------------------------------------------------------------------------------------------------------------------------------------------------------------------------------------------|
| Page S2: | Figure S1.                                                                                                                                                                                  |
| Page S3: | Figure S2.                                                                                                                                                                                  |
| Page S4: | Figure S3.                                                                                                                                                                                  |
| Page S5: | <sup>1</sup> H NMR spectra of assemblies ( <b>1</b> ) <sub>2</sub> ·NBu <sub>4</sub> OH and ( <b>2</b> ) <sub>2</sub> ·NBu <sub>4</sub> OH.                                                 |
| Page S6: | <sup>1</sup> H NMR spectra of assemblies ( <b>3</b> ) <sub>2</sub> ·NBu <sub>4</sub> OH, ( <b>4</b> ) <sub>2</sub> ·NBu <sub>4</sub> OH and ( <b>5</b> ) <sub>2</sub> ·NBu <sub>4</sub> OH. |
| Page S8: | Displacement ellipsoid plot of structure ( <b>1</b> ) <sub>2</sub> ·NBu <sub>4</sub> OH.                                                                                                    |
| Page S9: | Molecular structure determined for assembly ( <b>2</b> ) <sub>2</sub> ·NBu <sub>4</sub> OH.                                                                                                 |

Figure S1

Comparison between the spectra of free Zn(salphen) **1** and complex **(1)<sub>2</sub>·NBu<sub>4</sub>OH** (aromatic region – upper, and aliphatic region – lower spectrum): all in (*d*<sub>6</sub>-acetone)

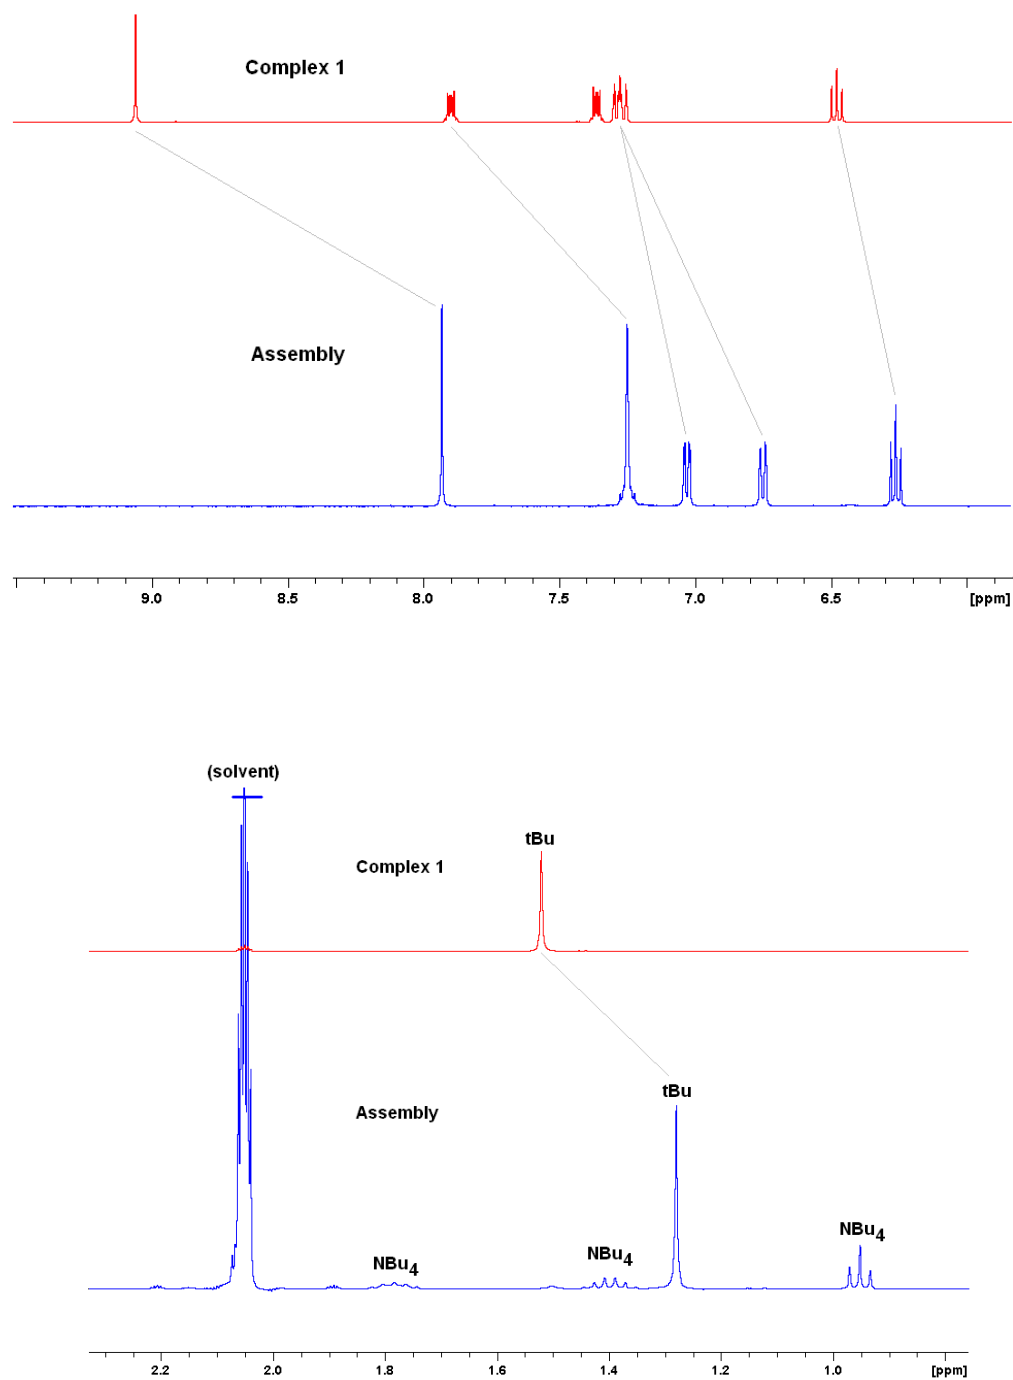

Figure S2

NOESY of assembly  $(\mathbf{1})_2 \cdot \text{NBu}_4\text{OH}$  ( $d_6$ -acetone)

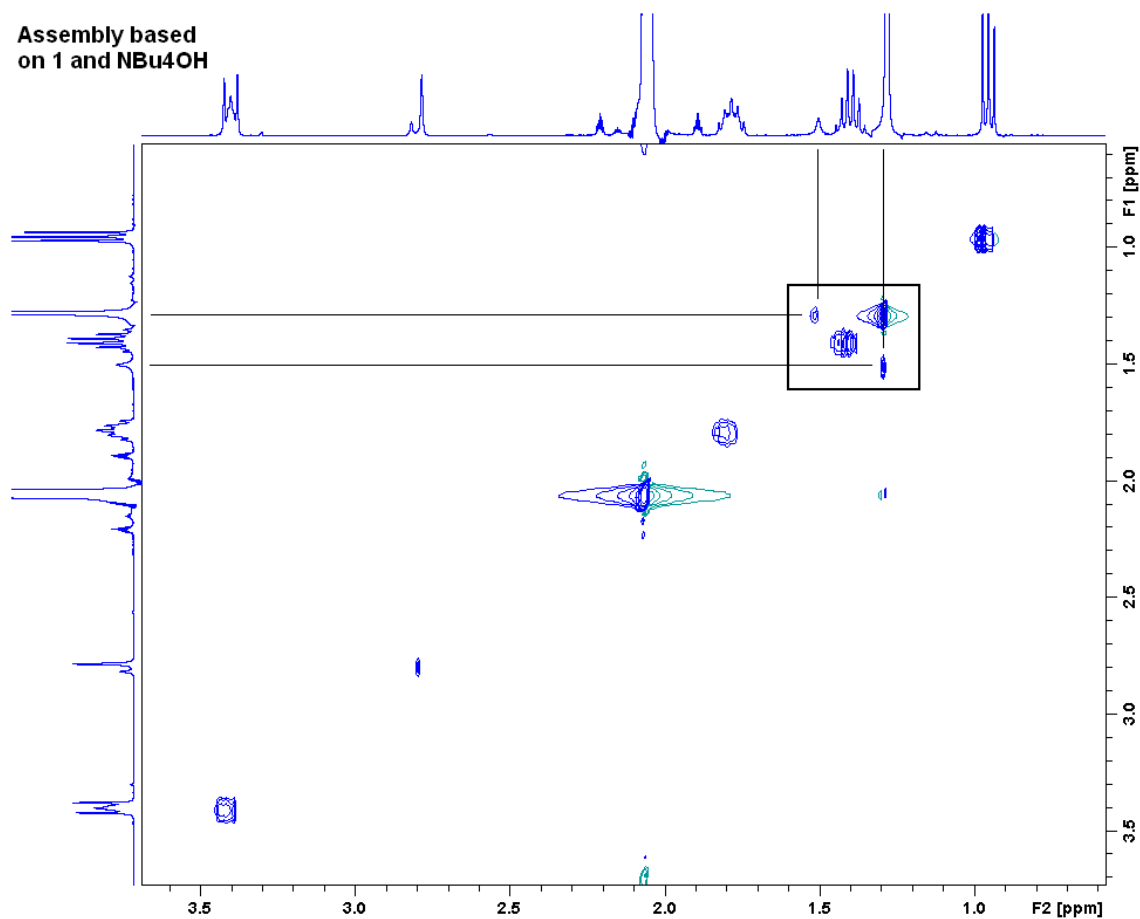

Figure S3

$^1\text{H}$  NMR comparison with assembly  $(\mathbf{2})_2\cdot\text{NBu}_4\text{OH}$  ( $d_6$ -acetone)

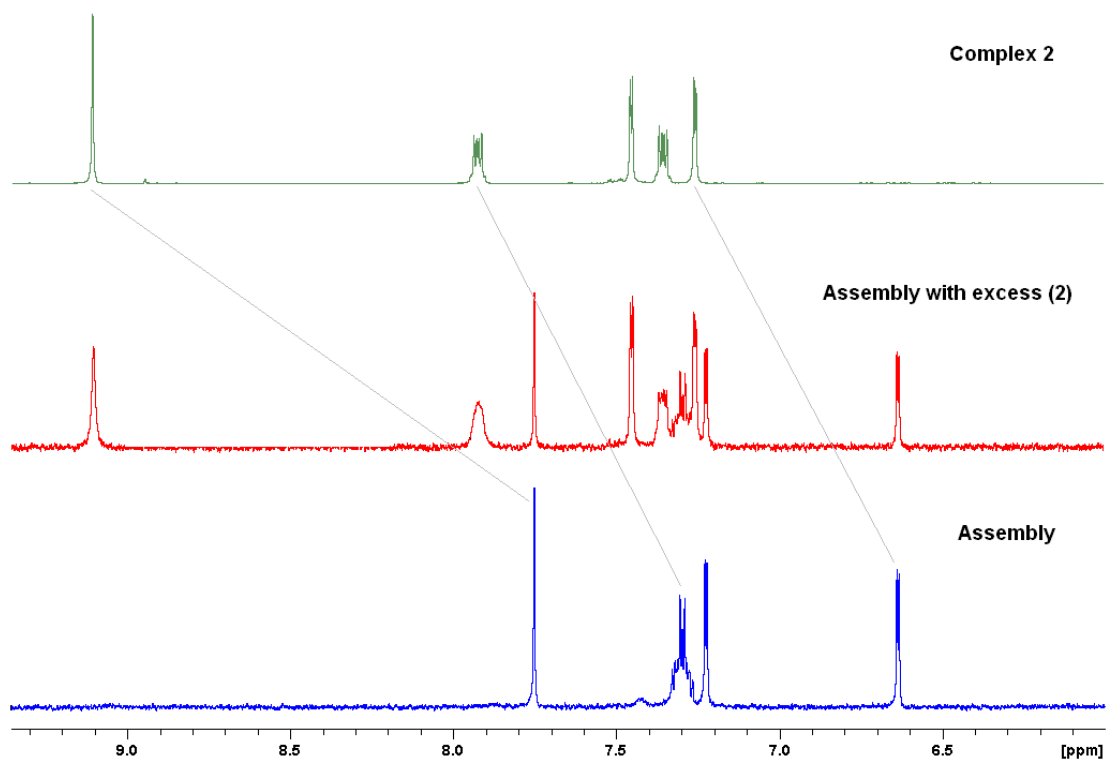

In green: Complex  $(\mathbf{2})$

In red: Assembly  $(\mathbf{2})_2\cdot\text{NBu}_4\text{OH}$  with 3 equiv of free  $(\mathbf{2})$

In blue: Pure assembly  $(\mathbf{2})_2\cdot\text{NBu}_4\text{OH}$

# <sup>1</sup>H NMR spectra of assemblies (1)<sub>2</sub>·NBu<sub>4</sub>OH and (2)<sub>2</sub>·NBu<sub>4</sub>OH.

(1)<sub>2</sub>·NBu<sub>4</sub>OH (*d*<sub>6</sub>-acetone):

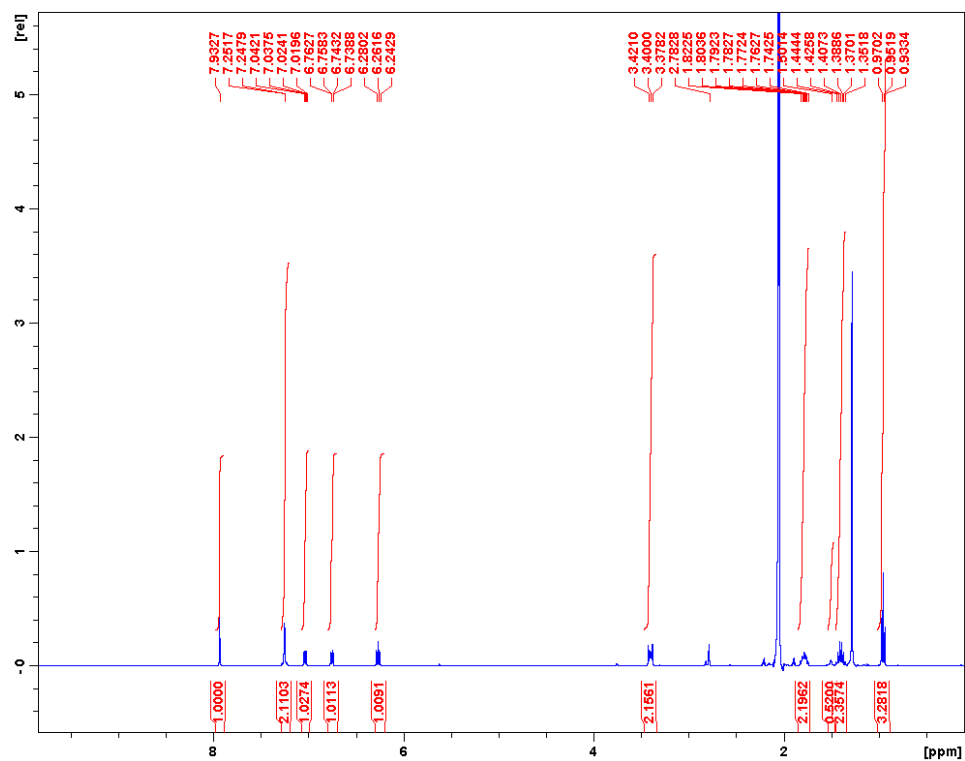

(2)<sub>2</sub>·NBu<sub>4</sub>OH (*d*<sub>6</sub>-acetone):

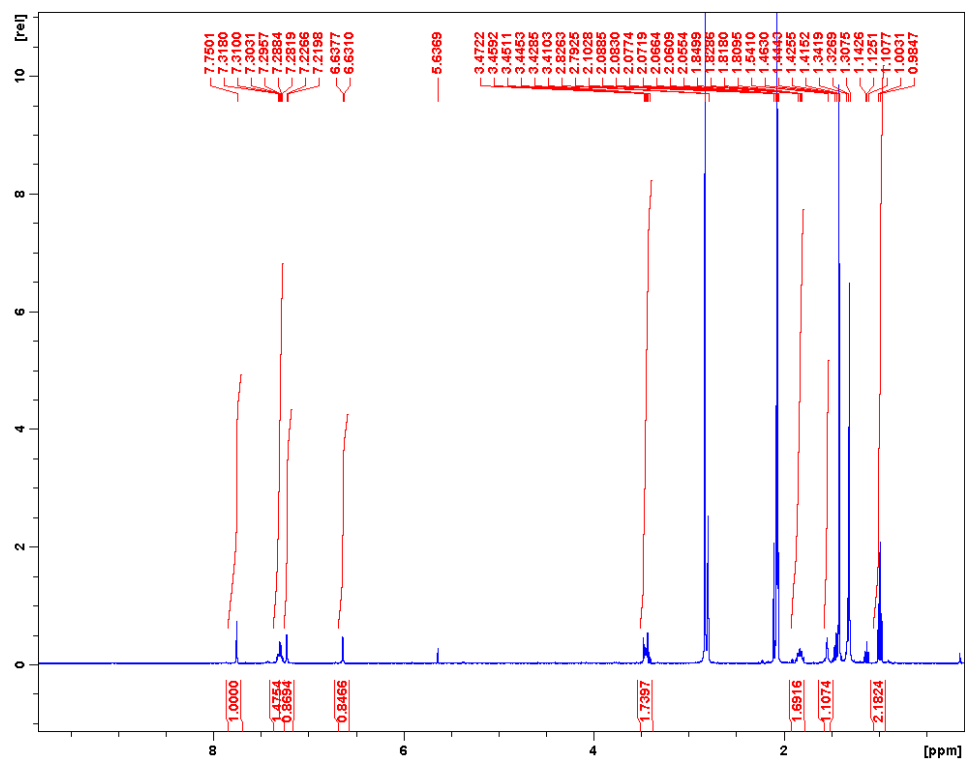

<sup>1</sup>H NMR spectra of assemblies (3)<sub>2</sub>·NBu<sub>4</sub>OH, (4)<sub>2</sub>·NBu<sub>4</sub>OH and (5)<sub>2</sub>·NBu<sub>4</sub>OH

**(3)<sub>2</sub>·NBu<sub>4</sub>OH** (*d*<sub>6</sub>-acetone):

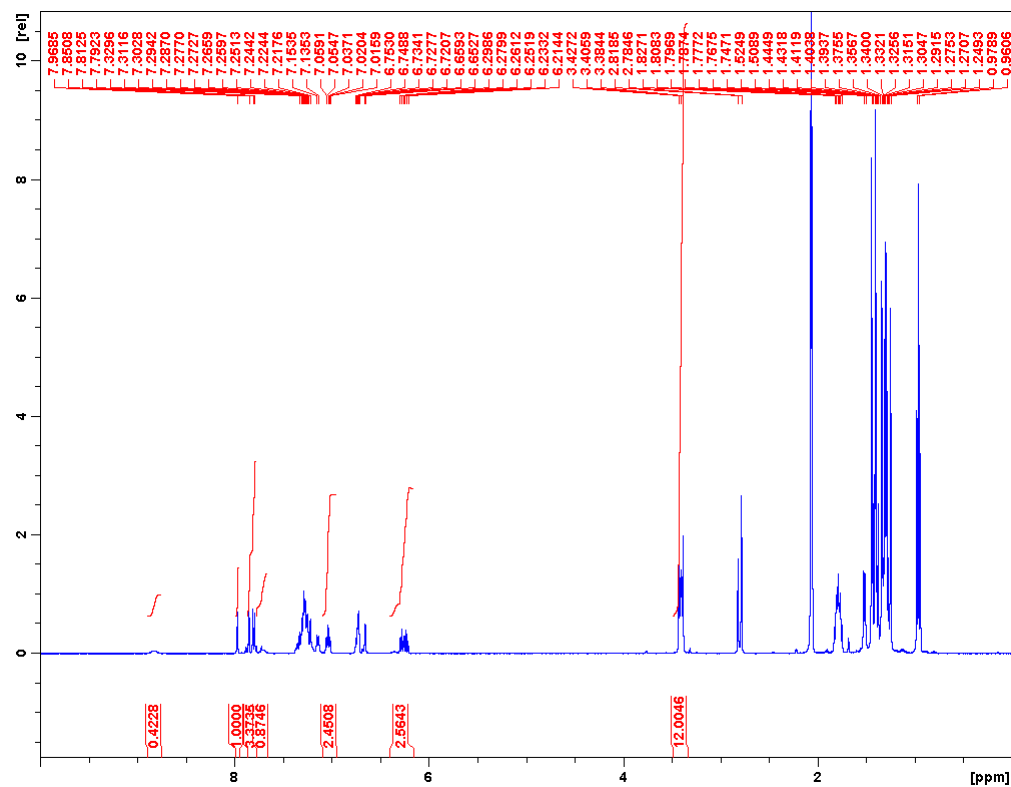

(**4**)<sub>2</sub>·NBu<sub>4</sub>OH (*d*<sub>6</sub>-acetone):

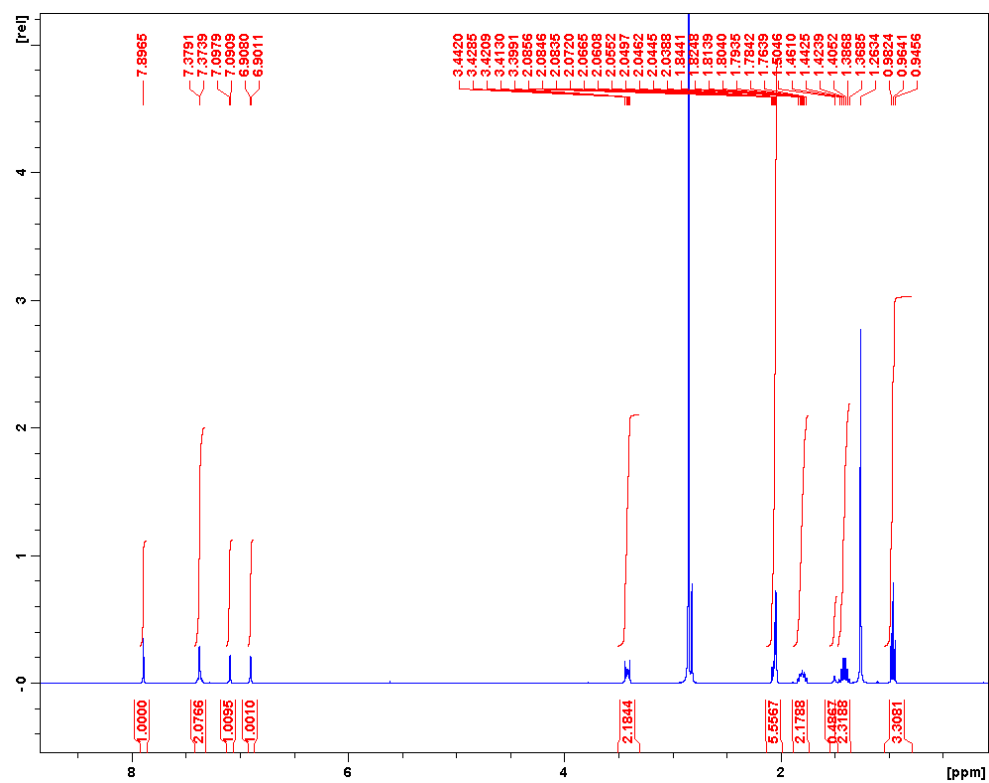

(5)<sub>2</sub>·NBu<sub>4</sub>OH (*d*<sub>6</sub>-acetone):

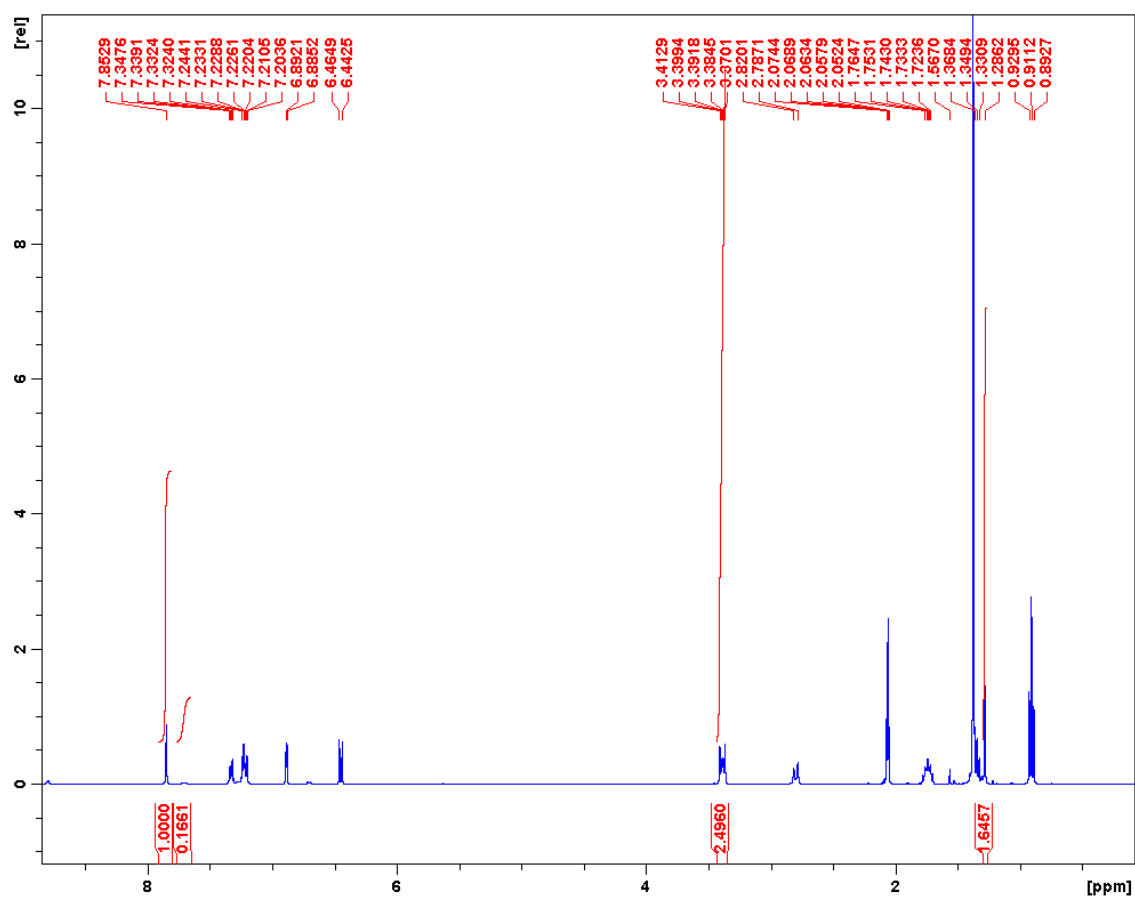

Displacement ellipsoid plot of structure  $(\mathbf{1})_2 \cdot \text{NBu}_4\text{OH}$ .

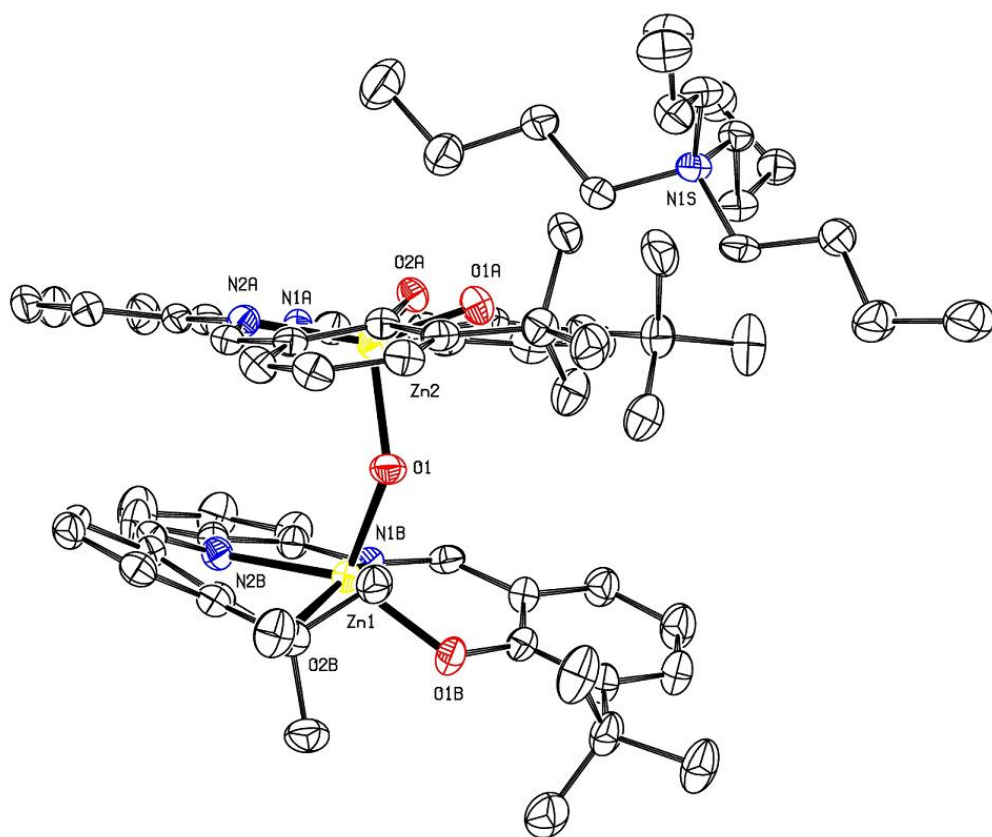



Molecular structure determined for assembly  $(\mathbf{2})_2 \cdot \text{NBu}_4\text{OH}$ .

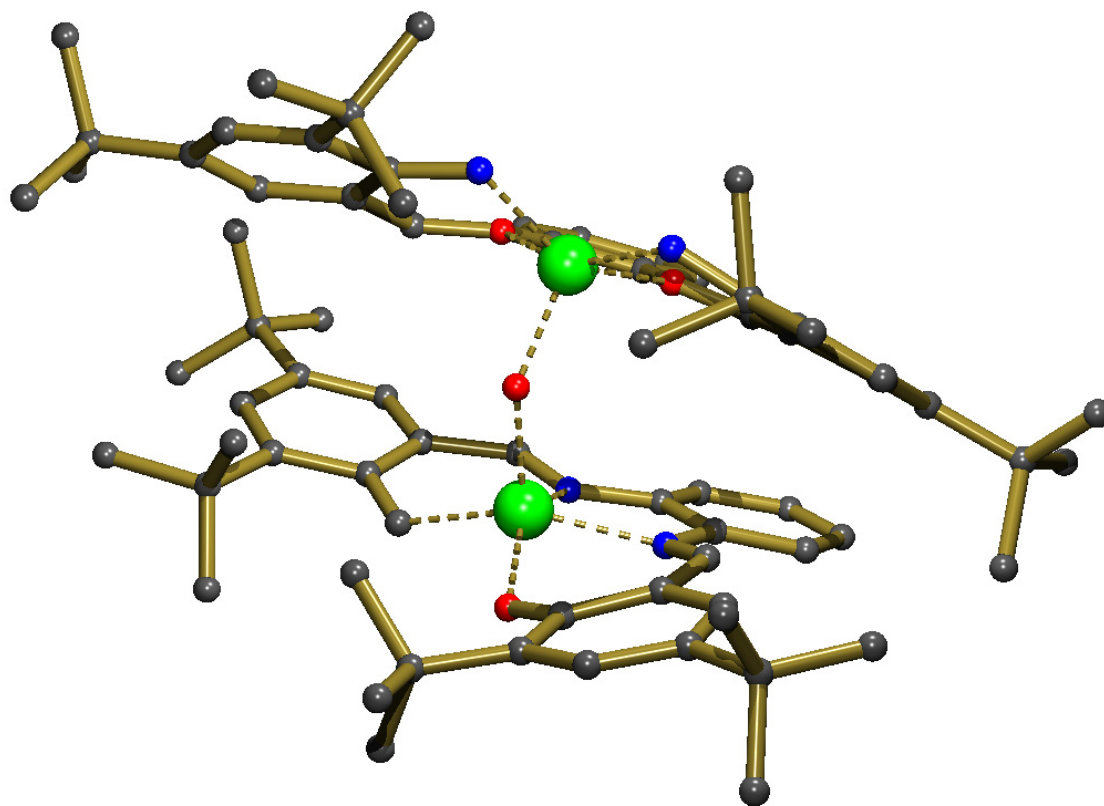

$R1 = 0.137$

The structure could not be completely refined. Please note that the  $\text{NBu}_4$  cation is here omitted for clarity.
